# Supplementary material
Source: PubMed Central journal article supplement (PMC11459696)
Supplement: NIHMS2016692-supplement-Supplementary_Material.pdf [file NIHMS2016692-supplement-Supplementary_Material.pdf]

# THE LANCET

## Haematology

### Supplementary appendix

This appendix formed part of the original submission and has been peer reviewed.  
We post it as supplied by the authors.

Supplement to: Piel FB, Rees DC, DeBaun MR, et al. Defining global strategies to improve outcomes in sickle cell disease: a *Lancet Haematology* Commission. *Lancet Haematol* 2023; published online July 11. [https://doi.org/10.1016/S2352-3026\(23\)00096-0](https://doi.org/10.1016/S2352-3026(23)00096-0).

## APPENDIX:

### Defining global strategies to improve outcomes in sickle cell disease: *a Lancet Haematology commission*

Piel, F.B., Rees, D.C., DeBaun, M.R., Nnodu, O., Ranque, B., Thompson, A.A., Ware, R.E., Abboud, M.R., Abraham, A., Ambrose, E.E., Andemariam, B., Colah, R., Colombatti, R., Conran, N., Costa, F.F., Cronin, R.M., de Montalembert, M., Elion, J., Esrick, E., Greenway, A.L., Idris, I.M., Issom, D.-Z., Jain, D., Jordan, L.C., Kaplan, Z.S., King, A.A., Lloyd-Puryear, M., Oppong, S.A., Sharma, A., Sung, L., Tshilolo, L., Wilkie, D.J. & Ohene-Frempong, K.

## Laboratory methods for haemoglobinopathy testing

IEF is a very sensitive method and is widely used in LMICs at relatively low cost. IEF separates haemoglobin species according to their isoelectric point on a gel medium. Bands are very sharp compared with classic electrophoresis, and HbF and HbA bands are clearly distinct. The relevant atypical haemoglobin variants can be readily detected. An important disadvantage is that this method is a non-automated technique and therefore time consuming, and the results rely on accurate interpretation by appropriately trained and experienced staff.

HPLC is based on the sequential elution of positively charged haemoglobin species (cations) bound to a negatively charged solid phase in a chromatographic column by buffers, with a gradient of increasing ionic strength. Haemoglobin species eluted from the column are detected by a dual-wavelength detector, generating a chromatogram on which each haemoglobin peak is characterised by its elution time and quantified by integrating its area under the curve. HPLC is a highly resolutive and sensitive technique (detection limit for HbA and HbS is approximately 1% of total haemoglobin). The advantages are that this method is automated, with computer-aided identification and quantification of the haemoglobin species. Disadvantages are the cost of the equipment, the need for technical support and maintenance, the cost of the reagents, and the need for reliable supplies of electricity. It has become the major first-line screening procedure in HICs and the reference control procedure in many reference centres in LMICs.

CE separates different haemoglobins according to their electrophoretic mobility and an electro-osmotic flow generated by a high-voltage electric field in a glass capillary. Haemoglobin species are prompted to migrate toward a 415 nm wavelength detector generating an electropherogram. Haemoglobin species are identified according to their migration zones and relatively quantified. Advantages and disadvantages are similar to HPLC, although the procedure is a bit less costly.

Mass-spectrometry-based techniques allow the identification of haemoglobin species according to the difference in molecular mass of globin or peptide chain fragments. Mass spectrometers are highly sophisticated instruments that can be used in different ways. Two variants of the technique are used for sickle cell disease NBS: tandem mass spectrometry<sup>1</sup> and matrix-assisted laser desorption–ionisation (MALDI) mass spectrometry.<sup>2</sup> In the tandem approach, two mass spectrometers are coupled to separate then identify peptide fragments issued from the tryptic digestion of haemoglobin. The MALDI mass spectrometry approach uses one single mass spectrometry machine to analyse the globin chains as a whole or after fragmentation. An advantage of tandem mass spectrometry is that it is more specific than electrophoretic and chromatographic techniques, allowing the accurate identification of most haemoglobin variants; the disadvantage is that the initial set up is time consuming (similar to IEF). An advantage of the MALDI mass spectrometry is that analysis is extremely rapid and thus the system is amenable to very high throughputs; the disadvantage is that it has only been widely applied to haemoglobin analysis over the last 10 years and currently not all the variants can be identified. Both approaches benefit from a computer-aided identification of the variants, removing operator-dependent variability. The cost of the machines is very high, but tandem mass spectrometry is also used to screen for many other

newborn conditions in HICs, and MALDI mass spectrometry machines routinely equip microbiology laboratories in HICs and an increasing number of reference microbiology laboratories in LMICs.

#### References

- 1 Moat SJ, Rees D, George RS, et al. Newborn screening for sickle cell disorders using tandem mass spectrometry: three years' experience of using a protocol to detect only the disease states. *Ann Clin Biochem* 2017; **54**: 601–11.
- 2 Naubourg P, El Osta M, Rageot D, et al. A multicentre pilot study of a two-tier newborn sickle cell disease screening procedure with a first tier based on a fully automated MALDI-TOF MS platform. *Int J Neonatal Screen* 2019; **5**: 10.

## Supplementary Tables

**Supplementary table S1:** Different genotypes which have been shown to cause sickle cell disease, grouped together according to severity. Estimated prevalence as cause of sickle cell disease shown in brackets. Types of HbS/ $\beta$  thalassaemia more common in India, Middle East and southern Europe, and HbSC most common in West Africa.

| Sickle cell disease                    |                                               |                                                                                    |                                                 |                               |              |
|----------------------------------------|-----------------------------------------------|------------------------------------------------------------------------------------|-------------------------------------------------|-------------------------------|--------------|
| Most severe                            |                                               |  |                                                 |                               | Least severe |
| Sickle cell anaemia                    | Severe sickle cell disease                    | Moderately severe sickle cell disease                                              | Mild sickle cell disease                        | Very mild sickle cell disease |              |
| HbSS<br>(70 – 90%)                     | Severe HbS/ $\beta^+$ thalassaemia<br>(1-10%) | Moderate HbS/ $\beta^+$ thalassaemia<br>(1 – 10%)                                  | Mild HbS/ $\beta^{++}$ thalassaemia<br>(1 – 5%) | HbS/HPFH<br>(1%)              |              |
| HbS/ $\beta^0$ thalassaemia<br>(1-10%) | HbS/O-Arab<br>(1-2%)                          | HbSC<br>(1 – 30%)                                                                  | HbSE<br>(<1%)                                   | HbS + other variants<br>(<1%) |              |
|                                        | HbS/D-Punjab<br>(1 -2%)                       | HbA/S-Oman<br>(1 – 2%)                                                             | HbA/Jamaica Plain<br>(<0.1%)                    |                               |              |
|                                        | HbS/C-Harlem<br>(<0.1%)                       |                                                                                    |                                                 |                               |              |
|                                        | HbC/S-Antilles<br>(<0.1%)                     |                                                                                    |                                                 |                               |              |
|                                        | HbS/Quebec-CHORI<br>(<0.1%)                   |                                                                                    |                                                 |                               |              |

**Supplementary Table S2:** Examples of current global and regional networks focusing on sickle cell disease.

| <b>Network</b>                                                              | <b>Scale</b>                                                                                                                       | <b>Aims</b>                                                                                                                                                                                                                                               |
|-----------------------------------------------------------------------------|------------------------------------------------------------------------------------------------------------------------------------|-----------------------------------------------------------------------------------------------------------------------------------------------------------------------------------------------------------------------------------------------------------|
| <b>Global Sickle Cell Disease Network (GSCDN)</b>                           | World                                                                                                                              | To bring together clinicians and scientists from HICs and LMICs to collaborate on education, screening, management and prevention programmes, and to generate useful data to guide policies.                                                              |
| <b>Sickle Pan African Research Consortium (SPARCO)</b>                      | Tanzania, Ghana & Nigeria                                                                                                          | To develop research capacity for SCD through a multidimensional approach which addresses infrastructure, education & training, provision of longitudinal research data and the translation of research into practise                                      |
| <b>Réseau d'Etudes de la Drépanocytose en Afrique Centrale (REDAC)</b>      | Angola, Cameroon, Congo-Brazzaville, the Democratic Republic of Congo, Gabon, Kenya, Tanzania, Uganda & Zambia                     | To bring together researchers and clinicians involved in SCD to harmonize the care and offer African patients the possibility of benefiting from quality basic therapies.                                                                                 |
| <b>Caribbean Association of Researchers in SCD and Thalassemia (CAREST)</b> | Barbados, Cuba, Dominican Republic, French Guyana, Grenada, Guadeloupe, Haïti, Jamaica, Martinique, Saint Lucia, Trinidad & Tobago | To establish collaborations to promote SCD newborn screening programs and early childhood care, to facilitate health worker training and approaches for prevention and treatment of SCD complications, and to carry out inter-Caribbean research studies. |

**Supplementary Table S3:** Estimated birth prevalence of sickle cell disease (SCD) in countries derived from large and pilot newborn screening programme.

| Country                           | State           | SCD birth prevalence (per 1,000) | Reference (url/doi)                                                                                                                                                                                                                    |
|-----------------------------------|-----------------|----------------------------------|----------------------------------------------------------------------------------------------------------------------------------------------------------------------------------------------------------------------------------------|
| <b>LARGE SCREENING PROGRAMMES</b> |                 |                                  |                                                                                                                                                                                                                                        |
| <b>Belgium</b>                    | Brussels, Liege | 0.43                             | Le et al 2018.<br><a href="https://doi.org/10.1177/0969141317701166">https://doi.org/10.1177/0969141317701166</a>                                                                                                                      |
| <b>Brazil</b>                     | Bahia           | 1.54                             | Brazilian Ministry of Health, 2013.<br><a href="https://bvsms.saude.gov.br/bvs/publicacoes/doenca_falciforme_saiba_ou_nde_tratamento.pdf">https://bvsms.saude.gov.br/bvs/publicacoes/doenca_falciforme_saiba_ou_nde_tratamento.pdf</a> |
|                                   | Rio de Janeiro  | 0.77                             |                                                                                                                                                                                                                                        |
|                                   | Minas Gerais    | 0.71                             |                                                                                                                                                                                                                                        |
| <b>France</b>                     | /               | 0.30-0.49                        | Leleu et al, 2021.<br><a href="https://doi.org/10.1371/journal.pone.0253986">https://doi.org/10.1371/journal.pone.0253986</a>                                                                                                          |
| <b>Spain</b>                      | /               | 0.03-0.18                        | García-Morín et al, 2020<br><a href="https://doi.org/10.1007/s00277-020-04044-z">https://doi.org/10.1007/s00277-020-04044-z</a>                                                                                                        |
| <b>UK</b>                         | /               | 0.47                             | Streetly et al, 2017<br><a href="http://dx.doi.org/10.1136/archdischild-2017-313213">http://dx.doi.org/10.1136/archdischild-2017-313213</a>                                                                                            |
| <b>USA</b>                        | /               | 0.52                             | Therell et al 2015.<br><a href="https://doi.org/10.1053/j.semperi.2015.03.008">https://doi.org/10.1053/j.semperi.2015.03.008</a>                                                                                                       |
| <b>PILOT SCREENING PROGRAMMES</b> |                 |                                  |                                                                                                                                                                                                                                        |
| <b>Ghana</b>                      | Accra           | 18                               | Segbefia et al, 2021.<br><a href="https://doi.org/10.1002/pbc.29068">https://doi.org/10.1002/pbc.29068</a>                                                                                                                             |
| <b>Tanzania</b>                   | /               | 8                                | 67                                                                                                                                                                                                                                     |
| <b>Uganda</b>                     | /               | 13                               | Hernandez et al, 2021.<br><a href="https://doi.org/10.1111/tmi.13506">https://doi.org/10.1111/tmi.13506</a>                                                                                                                            |

**Supplementary Bibliography:** List of references (in alphabetical order of the first author's lastname) used to assign countries to one of the categories (national, regional, pilot, no programme, no data) for the availability of a newborn screening programme for sickle cell disease.

1. Al Arrayed S, Al Hajeri A. Newborn Screening Services in Bahrain between 1985 and 2010. *Adv Hematol.* 2012;2012:903219.
2. B A, W K, Abdul-Mageed A, A. H. Towards a Uniform Newborn Screening Panel in the Kingdom of Saudi Arabia. *Acad J Ped Neonatol.* 2018;6(5):555753.
3. Darshana T, Bandara D, Nawarathne U, de Silva U, Costa Y, Pushpakumara K, et al. Sickle cell disease in Sri Lanka: clinical and molecular basis and the unanswered questions about disease severity. *Orphanet Journal of Rare Diseases.* 2020;15(1):177.
4. Dupré C, Brégère M, Berger M, Pichot V, Celle S, Garet M, et al. Relationship between moderate-to-vigorous, light intensity physical activity and sedentary behavior in a prospective cohort of older French adults: a 18-year follow-up of mortality and cardiovascular events – the PROOF cohort study. *Frontiers in Public Health.* 2023;11.
5. El-Haj N, Hoppe CC. Newborn Screening for SCD in the USA and Canada. *Int J Neonatal Screen.* 2018;4(4):36.
6. Franzson L. Newborn screening of Rare Diseases in Iceland and other Nordic Countries. 2012. URL: <https://www.greining.is/static/files/nordic-conference-2012/Leifur.pdf> (accessed 13/01/2023).
7. Giugliani R, Castillo Taucher S, Hafez S, Oliveira JB, Rico-Restrepo M, Rozenfeld P, et al. Opportunities and challenges for newborn screening and early diagnosis of rare diseases in Latin America. *Frontiers in Genetics.* 2022;13.
8. Australian Government. Conditions screened in Australia's NBS programs. In: Care DoHaA, editor. 2023. URL: <https://www.health.gov.au/our-work/newborn-bloodspot-screening/what-is-screened-in-the-program#:~:text=Conditions%20screened%20in%20Australia%27s%20NBS%20programs%20Newborn%20bloodspot,health%20technology%20assessment%20facilitated%20by%20the%20Australian%20Government.> (accessed 13/01/2023).
9. Granga D D. Neonatal screening for sickle cell disease in maternity hospitals in N'Djamena in Chad. Souam Nguele S , Hikdjolbo G , Douna G , Toralta J , Chene A , Youssouf H, Attimer K , Houenou Agbo Y, Ayivi B. 2021;14:22-8.
10. Green NS, Zapfel A, Nnodu OE, Franklin P, Tubman VN, Chirande L, et al. The Consortium on Newborn Screening in Africa for sickle cell disease: study rationale and methodology. *Blood Advances.* 2022;6(24):6187-97.
11. The Nassau Guardian. Sickle cell screening, national registry could identify trends in population. The Nassau Guardian. 2022. URL: <https://thenassauguardian.com/sickle-cell-screening-national-registry-could-identify-trends-in-population/> (accessed 13/01/2023).



12. Hajer S, Neila T, Sondess HF, Fekria O, Nabila A, Mahbouba K, et al. A lower-cost protocol for sickle cell disease neonatal screening in Tunisia. *Annals of Saudi Medicine*. 2012;32(1):49-52.
13. Kasem A, Razeq NMA, Abuhammad S, Alkhazali H. Mothers' knowledge and attitudes about newborn screening in Jordan. *J Community Genet*. 2022;13(2):215-25.
14. Keikhaei B, Moradi Choghakabodi P, Rahim F, Pedram M, Yousefi H, Zandian K, et al. Neonatal Screening for Sickle Cell Disease in Southwest Iran. 2018:105-10.
15. Khoriaty E, Halaby R, Berro M, Sweid A, Abbas HA, Inati A. Incidence of sickle cell disease and other hemoglobin variants in 10,095 Lebanese neonates. *PLoS One*. 2014;9(9):e105109.
16. Kjellander C, Hernlund E, Ivergård M, Svedbom A, Dibbern T, Stenling A, et al. Sickle Cell Disease in Sweden - Prevalence and Resource Use Estimated through Population-Based National Registers. *Blood*. 2021;138(Supplement 1):2040-.
17. Knight-Madden J, Lee K, Elana G, Elenga N, Marcheco-Teruel B, Keshi N, et al. Newborn Screening for Sickle Cell Disease in the Caribbean: An Update of the Present Situation and of the Disease Prevalence. *Int J Neonatal Screen*. 2019;5(1):5.
18. Koracin V, Mlinaric M, Baric I, Brincat I, Djordjevic M, Drole Torkar A, et al. Current Status of Newborn Screening in Southeastern Europe. *Frontiers in Pediatrics*. 2021;9.
19. Loeber JG, Platis D, Zetterström RH, Almashanu S, Boemer F, Bonham JR, et al. Neonatal Screening in Europe Revisited: An ISNS Perspective on the Current State and Developments Since 2010. *Int J Neonatal Screen*. 2021;7(1).
20. Majid H, Jafri L, Ahmed S, Humayun K, Kirmani S, Ali N, et al. Perspective on newborn screening (NBS): Evidence sharing on conditions to be included in NBS in Pakistan. *J Pak Med Assoc*. 2022;72(3):526-31.
21. Morales A, Wierenga A, Cuthbert C, Sacharow S, Jayakar P, Velazquez D, et al. Expanded newborn screening in Puerto Rico and the US Virgin Islands: education and barriers assessment. *Genet Med*. 2009;11(3):169-75.
22. Mutesa L, Boemer F, Ngendahayo L, Rulisa S, Rusingiza EK, Cwinya-Ay N, et al. Neonatal screening for sickle cell disease in Central Africa: a study of 1825 newborns with a new enzyme-linked immunosorbent assay test. *J Med Screen*. 2007;14(3):113-6.
23. Padilla CD, Therrell BL, Alcausin MMLB, de Castro RC, Gepte MBP, Reyes MEL, et al. Successful Implementation of Newborn Screening for Hemoglobin Disorders in the Philippines. *International Journal of Neonatal Screening*. 2021;7(2):30.
24. Rouh AlDeen N, Osman AA, Alhabashi MJ, Al Khaldi R, Alawadi H, Alromh MK, et al. The Prevalence of  $\beta$ -Thalassemia and Other Hemoglobinopathies in Kuwaiti Premarital Screening Program: An 11-Year Experience. *J Pers Med*. 2021;11(10).

25. Tegha G, Topazian H, Kamthunzi P, Howard T, Tembo Z, Mvalo T, et al. Prospective Newborn Screening for Sickle Cell Disease and Other Inherited Blood Disorders in Central Malawi. *International Journal of Public Health*. 2021;66.
26. Vasconcelos A, Sousa S, Bandeira N, Alves M, Papoila AL, Pereira F, et al. Antenatal screenings and maternal diagnosis among pregnant women in Sao Tome & Principe—Missed opportunities to improve neonatal health: A hospital-based study. *PLOS Global Public Health*. 2022;2(12):e0001444.
27. Medizinische Universität Wien. Gescreente Neugeborene in Österreich. 2022. URL: [https://www.meduniwien.ac.at/hp/fileadmin/neugeborenenenscreening/pdf/Zahlen\\_und\\_Daten\\_aus\\_dem\\_Neugeborenenenscreening\\_2021\\_Mai22\\_.pdf](https://www.meduniwien.ac.at/hp/fileadmin/neugeborenenenscreening/pdf/Zahlen_und_Daten_aus_dem_Neugeborenenenscreening_2021_Mai22_.pdf) (accessed 13/01/2023).
28. أبوبكر معروف ميلاد سعد و أحمد علي الجنقة و رحمة عبدالنبي كوسكن و النور محمد ا. Prevalence of hemoglobinopathies in Ghat-South Libya. *Journal of Pure & Applied Sciences*. 2018;17(1).
